# Supplementary material for: Structurally defective cerium doped lutetium–yttrium oxyorthosilicates for optically stimulated luminescence imaging devices
Source: Royal Society of Chemistry journal article supplement (doi:10.1039/c1jm13456f), 2011-01-01

Supplementary material for

## Structural Defective Cerium Doped Lutetium-Yttrium Oxyorthosilicates for Optically Stimulated Luminescence Imaging Devices

Pier Carlo Ricci,<sup>\*a</sup> Carlo Maria Carbonaro<sup>a,b</sup> and Alberto Anedda<sup>a,b</sup>

<sup>1</sup>Dipartimento di Fisica, Università di Cagliari, s.p. n 8 Km 0.700, 09042 Monserrato (Cagliari), Italy

<sup>2</sup>Centro Grandi Strumenti Università di Cagliari, s.p. n 8 Km 0.700, 09042 Monserrato (Cagliari), Italy

**S1** - OSL Intensity as a function of the irradiation time with X-rays (20 kV, 20 mA). . The OSL was registered by exciting the sample with 514.5 nm line at 10 mw/cm<sup>2</sup>.

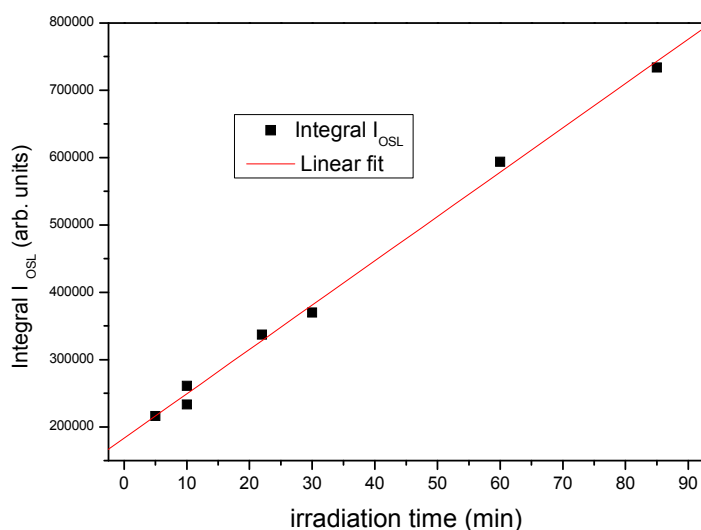

**S2** - OSL intensity values obtained after 15 s exposition to X-rays at 20 kV 20 mA. The OSL was registered by exciting the sample with 514.5 nm line at 10 mw/cm<sup>2</sup>. The same procedure was repeated to test the reproducibility of the result (the values are normalized respect to the first measure for sake of clarity).

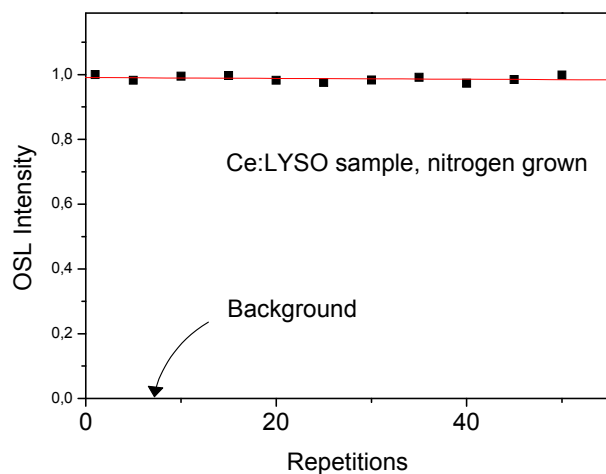

**S3** - OSL intensity values obtained after long X-ray exposition (20 kV 20 mA). Each measure was obtained after heating treatment at 500 K for 10 minutes to empty the traps; then, the sample was irradiated for 15 s (X-rays 20 KV 20 mA) and the OSL was subsequently registered (514.5 nm -10 mW/cm<sup>2</sup>). The

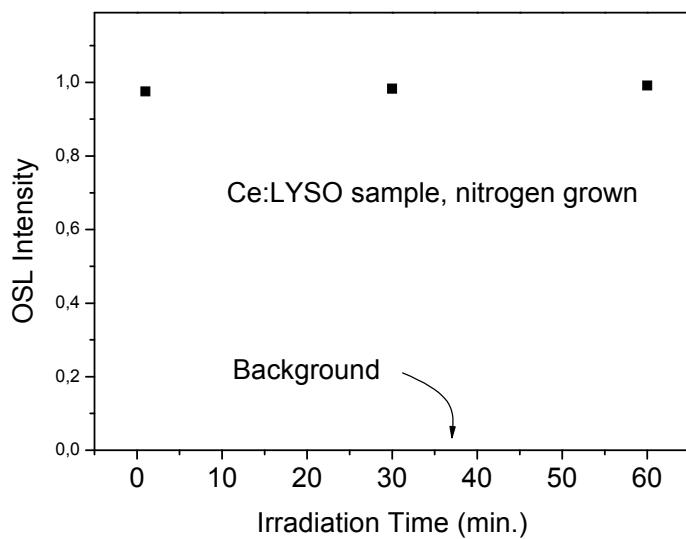

Supplement: c1jm13456f.pdf [file c1jm13456f.pdf]
